# Supplementary material for: Treatment decisions and survival for people with small-cell lung cancer
Source: PubMed Central journal article supplement — Br J Cancer. 2014 Jan 7;110(4):908–15. doi: 10.1038/bjc.2013.812 (PMC3929890; doi:10.1038/bjc.2013.812), 2014-01-07
Supplement: bjc2013812x1.pdf [file bjc2013812x1.pdf]

Supplementary table A: Survival from end of last chemotherapy cycle

| <b>Survival analysis from end of chemotherapy</b> |                                               | <b>Total patients</b> | <b>Deaths</b>  |          | <b>Hazard ratio (HR)</b> | <b>95% CI</b> |      | <b>Adjusted HR*</b> |
|---------------------------------------------------|-----------------------------------------------|-----------------------|----------------|----------|--------------------------|---------------|------|---------------------|
|                                                   |                                               | <b>N=7,866 (a)</b>    | <b>n=7,149</b> | <b>%</b> |                          |               |      |                     |
| <b>Time to treatment</b>                          | <b>&lt;18 days</b>                            | 3,794                 | 3,524          | 92.9     | <b>1.00</b>              |               |      |                     |
|                                                   | <b>≥18 days</b>                               | 4,072                 | 3,625          | 89.0     | <b>0.84</b>              | 0.80          | 0.88 | <b>0.88</b>         |
| <b>Chemotherapy cycles</b>                        | <b>1-3 cycles</b>                             | 2,413                 | 2,300          | 95.3     | <b>1.00</b>              |               |      |                     |
|                                                   | <b>≥4 cycles</b>                              | 5,453                 | 4,849          | 88.9     | <b>0.58</b>              | 0.55          | 0.60 | <b>0.61</b>         |
| <b>Radiotherapy</b>                               | <b>No chemo-radiotherapy</b>                  | 7,095                 | 6,538          | 92.1     | <b>1.00</b>              |               |      |                     |
|                                                   | <b>Chemo-radiotherapy</b>                     | 771                   | 611            | 79.2     | <b>0.57</b>              | 0.53          | 0.62 | <b>0.72</b>         |
| <b>Trust first seen</b>                           | <b>Non-chemotherapy trust</b>                 | 1,867                 | 1,675          | 89.7     | <b>1.00</b>              |               |      |                     |
|                                                   | <b>Chemotherapy trust</b>                     | 5,984                 | 5,461          | 91.3     | <b>1.05</b>              | 1.00          | 1.11 | <b>1.04</b>         |
|                                                   | <b>Missing / trust which saw &lt;20 cases</b> | 15                    | 13             | 86.7     | <b>0.85</b>              | 0.49          | 1.47 | <b>0.76</b>         |

(a) this excludes the 1,814 cases with chemotherapy only recorded in the NLCA and 902 who died before completing their final cycle of chemotherapy; HR hazard ratio; \*Adjusted for sex, age, performance status, co-morbidity index and stage

---

*95% CI*

---

*0.84 0.93*

*0.58 0.64*

*0.66 0.78*

*0.98 1.09*

*0.44 1.31*

---
